# Supplementary material for: Metagenomic next-generation sequencing for mixed pulmonary infection diagnosis
Source: Springer Nature journal article supplement (doi:10.1186/s12890-019-1022-4), 2019-12-01

Additional file 1 Diagnostic flow chart for mixed pulmonary infection

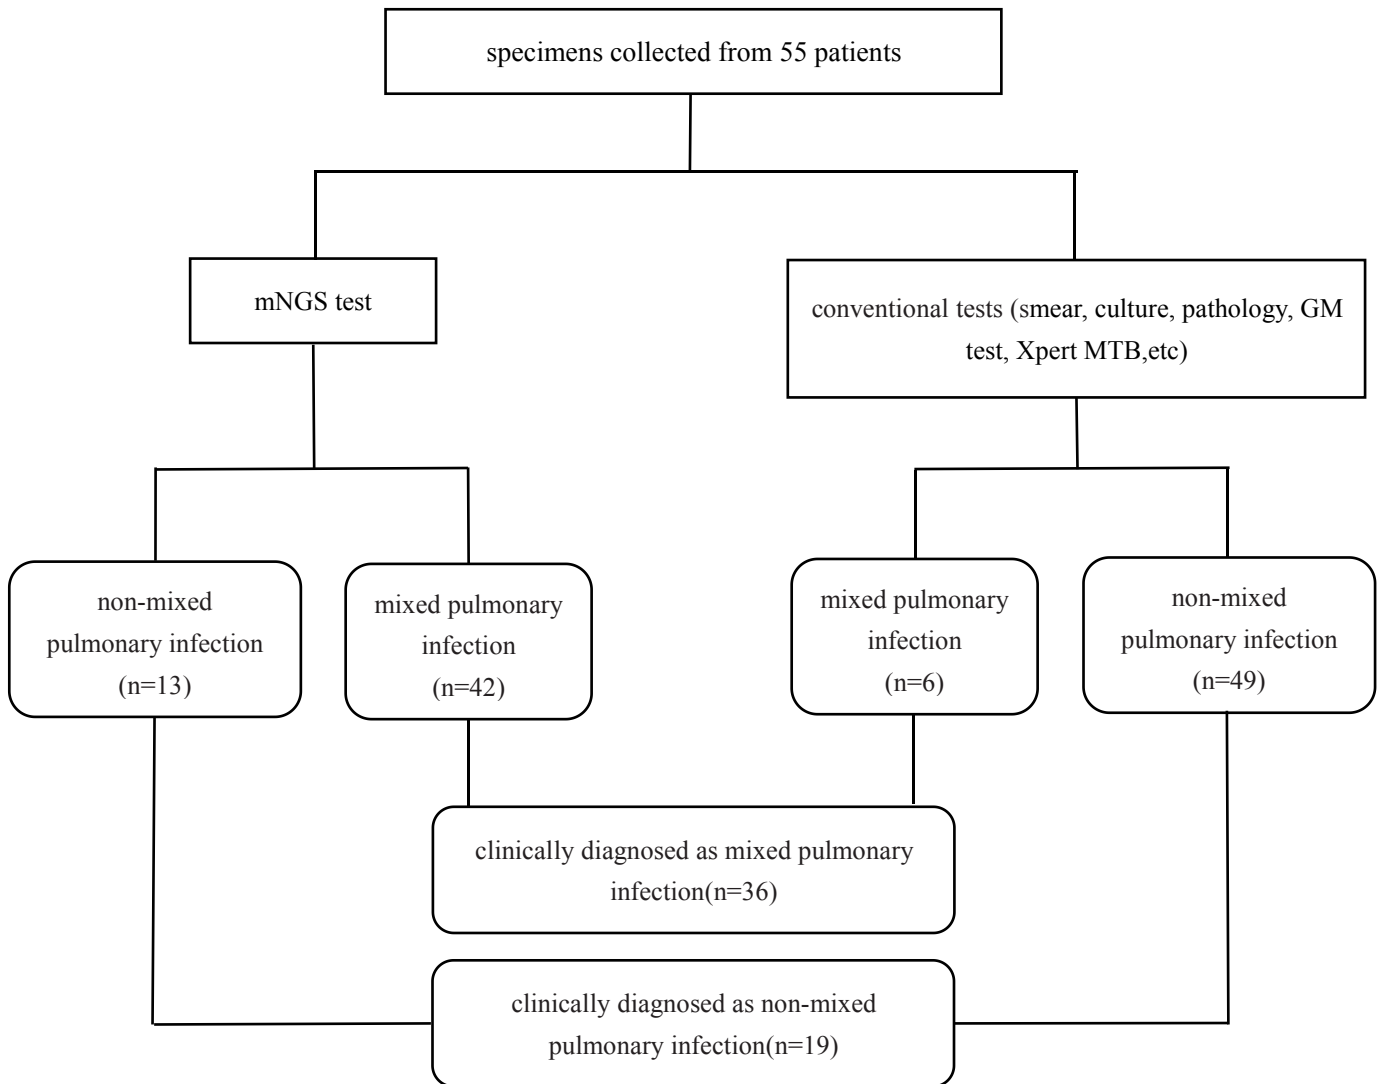

Supplement: MOESM1 [file 17641546]
